# Supplementary material
Source: MDPI journal article supplement (https://www.mdpi.com/2304-6775/10/4/43)
Supplement: s1 [file s1]

Table S1: Supplementary materials-survey questions.

*Survey questionnaire - Communication channels and information retrieval groups*

15. Information for the field of teaching activity can be found through:

|                                                               | Never | Rare<br>(<10%) | Sometimes,<br>irregularly<br>(about 30%) | Occasionally<br>(about 50%) | Often<br>(about 70%) | Mostly<br>(about 90%) | Always |
|---------------------------------------------------------------|-------|----------------|------------------------------------------|-----------------------------|----------------------|-----------------------|--------|
| Talking to colleagues<br>(directly and indirectly)            |       |                |                                          |                             |                      |                       |        |
| Informal groups within<br>and outside the<br>polytechnic      |       |                |                                          |                             |                      |                       |        |
| Formal groups of<br>polytechnics (decision on<br>composition) |       |                |                                          |                             |                      |                       |        |
| Polytechnic Internet                                          |       |                |                                          |                             |                      |                       |        |
| Polytechnic intranet                                          |       |                |                                          |                             |                      |                       |        |
| Cloud (e.g. Office365)                                        |       |                |                                          |                             |                      |                       |        |
| LMS                                                           |       |                |                                          |                             |                      |                       |        |
| Social networks                                               |       |                |                                          |                             |                      |                       |        |
| Databases / Libraries                                         |       |                |                                          |                             |                      |                       |        |

16. Information for the purposes of the field of scientific activity can be found through:

|                                                               | Never | Rare<br>(<10%) | Sometimes,<br>irregularly<br>(about 30%) | Occasionally<br>(about 50%) | Often<br>(about 70%) | Mostly<br>(about 90%) | Always |
|---------------------------------------------------------------|-------|----------------|------------------------------------------|-----------------------------|----------------------|-----------------------|--------|
| Talking to colleagues<br>(directly and indirectly)            |       |                |                                          |                             |                      |                       |        |
| Informal groups within<br>and outside the<br>polytechnic      |       |                |                                          |                             |                      |                       |        |
| Formal groups of<br>polytechnics (decision on<br>composition) |       |                |                                          |                             |                      |                       |        |
| Polytechnic Internet                                          |       |                |                                          |                             |                      |                       |        |
| Polytechnic intranet                                          |       |                |                                          |                             |                      |                       |        |
| Cloud (e.g. Office365)                                        |       |                |                                          |                             |                      |                       |        |
| LMS                                                           |       |                |                                          |                             |                      |                       |        |
| Social networks                                               |       |                |                                          |                             |                      |                       |        |
| Databases / Libraries                                         |       |                |                                          |                             |                      |                       |        |

17. I collect information on the polytechnic's processes, decisions, rules, and reports through:

|                                                               | Never | Rare<br>(<10%) | Sometimes,<br>irregularly<br>(about 30%) | Occasionally<br>(about 50%) | Often<br>(about 70%) | Mostly<br>(about 90%) | Always |
|---------------------------------------------------------------|-------|----------------|------------------------------------------|-----------------------------|----------------------|-----------------------|--------|
| Talking to colleagues<br>(directly and indirectly)            |       |                |                                          |                             |                      |                       |        |
| Informal groups within<br>and outside the<br>polytechnic      |       |                |                                          |                             |                      |                       |        |
| Formal groups of<br>polytechnics (decision on<br>composition) |       |                |                                          |                             |                      |                       |        |
| Polytechnic Internet                                          |       |                |                                          |                             |                      |                       |        |
| Polytechnic intranet                                          |       |                |                                          |                             |                      |                       |        |
| Cloud (e.g. Office365)                                        |       |                |                                          |                             |                      |                       |        |
| LMS                                                           |       |                |                                          |                             |                      |                       |        |
| Social networks                                               |       |                |                                          |                             |                      |                       |        |
| email                                                         |       |                |                                          |                             |                      |                       |        |

18. I share or pass on my official information to my colleagues within the polytechnic through:

|                                                               | Never | Rare<br>(<10%) | Sometimes,<br>irregularly<br>(about 30%) | Occasionally<br>(about 50%) | Often<br>(about 70%) | Mostly<br>(about 90%) | Always |
|---------------------------------------------------------------|-------|----------------|------------------------------------------|-----------------------------|----------------------|-----------------------|--------|
| Talking to colleagues<br>(directly and indirectly)            |       |                |                                          |                             |                      |                       |        |
| Informal groups within<br>and outside the<br>polytechnic      |       |                |                                          |                             |                      |                       |        |
| Formal groups of<br>polytechnics (decision on<br>composition) |       |                |                                          |                             |                      |                       |        |
| Polytechnic Internet                                          |       |                |                                          |                             |                      |                       |        |
| Polytechnic intranet                                          |       |                |                                          |                             |                      |                       |        |
| Cloud (e.g. Office365)                                        |       |                |                                          |                             |                      |                       |        |
| LMS                                                           |       |                |                                          |                             |                      |                       |        |
| Social networks                                               |       |                |                                          |                             |                      |                       |        |
| email                                                         |       |                |                                          |                             |                      |                       |        |
